# Supplementary material for: Improving the activity and synergistic catalysis of l-aspartate β-decarboxylase by arginine introduction on the surface
Source: Royal Society of Chemistry journal article supplement (doi:10.1039/d2cy00700b), 2022-01-01
Supplement: d2cy00700b1.pdf [file d2cy00700b1.pdf]

**Supplementary information**

**Table S1.** The RMSD of enzyme backbone between each representative conformation

| RMSD of<br>enzyme backbone | WT/pH 5.0 | WT/pH 7.0 | E88R/pH 5.0 | E88R/pH 7.0 |
|----------------------------|-----------|-----------|-------------|-------------|
| WT/pH 5.0                  | 0         | 1.332     | 1.465       | 1.823       |
| WT/pH 7.0                  | 1.332     | 0         | 1.169       | 1.470       |
| E88R/pH 5.0                | 1.465     | 1.169     | 0           | 1.720       |
| E88R/pH 7.0                | 1.823     | 1.470     | 1.720       | 0           |

**Table S2.** Primers used for the construction of variants

| Primes  | Sequences (5'-3')               |
|---------|---------------------------------|
| E81R-F  | GGAGGCCTGGCAAAGATCCGCGGCAT      |
| E81R-R  | CCCTTCTATGCCGCGGATCTTTGCCAG     |
| E88R-F  | GGCATAGAAGGGCGCTTCCGCCGCTAT     |
| E88R-R  | GGCAATATAGCGGCGGAAGCGCCCTT<br>C |
| E93R-F  | TTCGAACGCTATATTGCCCGCAACCGC     |
| E93R-R  | CTGATCGCGGTTGCGGGCAATATAGCG     |
| D96R-F  | TTCGAACGCTATATTGCCGAAAACCGC     |
| D96R-R  | CACGCCTTCCTGGCGGCGGTTTTTCGGC    |
| D159R-F | ATCCGTGAAATGGGGGCCCGCAATT       |
| D159R-R | GGACTCGCTGGGAATTGCGCGGGCCCC     |
| S163R-F | ATCCGTGAAATGGGGGCCGATGCAATT     |
| S163R-R | CAGGTTACGGACTCGCGGGGAATTGC      |
| E164R-F | ATCCGTGAAATGGGGGCCGATGCAATT     |
| E164R-R | CAGGTTACGGAGCGGCTGGGAATTG<br>C  |
| E264R-F | TCGGTAAAGATGGACCGCCGCAGCCT<br>G |
| E264R-R | CCATCGGTAAAGATGGACCGCCGCAG<br>C |
| E268R-F | CCATCGGTAAAGATGGACGAGCGCAG<br>C |
| E268R-R | CTTGCGCACACGGCGCAGGCTGCGCTC     |
| E344R-F | TTCGACTTGGCATTGGGCAGGCTGCCT     |
| E344R-R | TGTTTTCTCGGAGCGAGGCAGCCTGCC     |
| S345R-F | TTCGACTTGGCATTGGGCAGGCTGCCT     |
| S345R-R | TGTTTTCTCGCGCTCAGGCAGCCTGCC     |

|         |                                 |
|---------|---------------------------------|
| E346R-F | TTCGACTTGGCATTGGGCAGGCTGCCT     |
| E346R-R | CGCTGTTTTGCGGGACTCAGGCAGCCT     |
| T348R-F | TGGGCAGGCTGCCTGAGTCCGAGAAA      |
| T348R-R | ATCATCGAGCGCGGTTTCTCGGACTC      |
| D352R-F | CTGCCTGAGTCCGAGAAAACAGCGCTC     |
| D352R-R | ACGATAGCGATCGCGGAGCGCTGTTTT     |
| S363R-F | TATCGTTCACTGCTACCCGATGTGCGT     |
| S363R-R | TAGGAATTTCAAGCGACGCACATCGG<br>G |
| S405R-F | TTCTCGTTGTTTGCCTCATGGACGAG      |
| S405R-R | CTTGTA CTGGTCGCGCTCGTCCATGAG    |
| D448R-F | GATTACTACACCTTGATTGACCTGCAG     |
| D448R-R | CTTCGACGTCACGCGCTGCAGGTCAAT     |
| E456R-F | CAGGACGTGACGTCGAAGCTTTATGGC     |
| E456R-R | TTTCGAGAACGCGCGGCCATAAAGCTT     |
| D520R-F | ATAGGTCGTGCGCTGCGACAAATGGCT     |
| D520R-R | CGCGTACAGCTCGCGAGCCATTTGTCG     |
| T527R-F | ATGGCTGACGAGCTGTACGCGCAATAC     |
| T527R-R | GTTCCCTTGCTGGCGGTATTGCGCGTA     |

---

**Table S3.** The protonation state of residues predicted by PDB2PQR

| Enzyme<br>(condition) | Protonation<br>state | Residue         | Enzyme<br>(condition) | Protonation<br>state | Residue         |
|-----------------------|----------------------|-----------------|-----------------------|----------------------|-----------------|
| WT<br>(pH 7.0)        | ASPP                 | D287            | E88R<br>(pH 7.0)      | ASPP                 | D287            |
|                       | HSE                  | H123            |                       | HSE                  | H123            |
|                       |                      | H381            |                       |                      | H381            |
|                       | HSD                  | Other histidine |                       | HSD                  | Other histidine |
| WT<br>(pH 5.0)        |                      | D286            | E88R<br>(pH 5.0)      |                      | D286            |
|                       | ASPP                 | D287            |                       | ASPP                 | D287            |
|                       |                      | D336            |                       |                      | D336            |
|                       |                      | D445            |                       |                      | D445            |
|                       |                      | E84             |                       |                      | E84             |
|                       |                      | E124            |                       |                      | E124            |
|                       | GLUP                 | E155            |                       | GLUP                 | E155            |
|                       |                      | E220            |                       |                      | E220            |
|                       |                      | E420            |                       |                      | E420            |
|                       |                      | H123            |                       |                      | H123            |
|                       |                      | H277            |                       |                      | H277            |
|                       | HSP                  | H330            |                       | HSP                  | H330            |
|                       | H381                 |                 | H381                  |                      |                 |
|                       | H410                 |                 | H410                  |                      |                 |
|                       | HSD                  | Other histidine |                       | HSD                  | Other histidine |

Note:

ASPP: Protonated aspartic acid, proton on OD2;

GLUP: Protonated glutamic acid, proton on OE2;

HSP: Protonated histidine;

HSD: Neutral histidine, proton on ND1;

HSE: Neutral histidine, proton on NE2.

L-asp L-ala WT E81R E88R E93R D96R D159R S163R E164R E264R E268R E344R S345R E346R T348R D352R S363R S405R

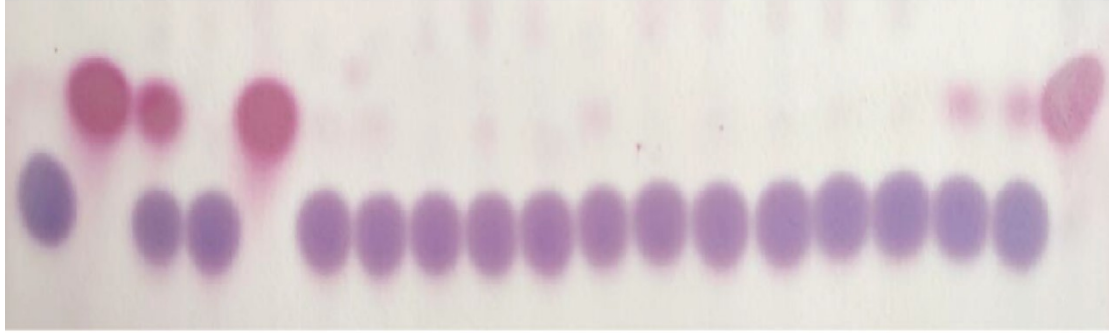

L-asp L-ala WT D448R E456R D520R T527R

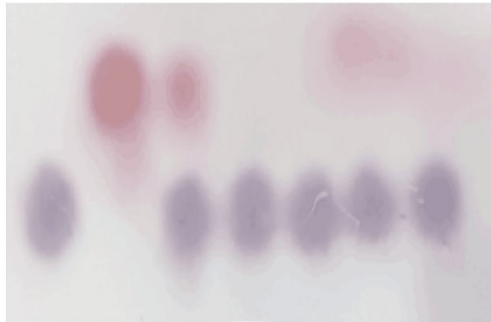

**Fig. S1.** Thin-plate chromatography analysis for screening of variants. The reaction was carried out at 37°C and 200 rpm for 4 h, supplying 100 mM L-aspartic acid and the cell biomass of  $OD_{600}=2.5$ . Samples of L-aspartic acid and L-alanine were spotted as controls and indicated by L-asp and L-ala, respectively. WT: wild-type ASD.

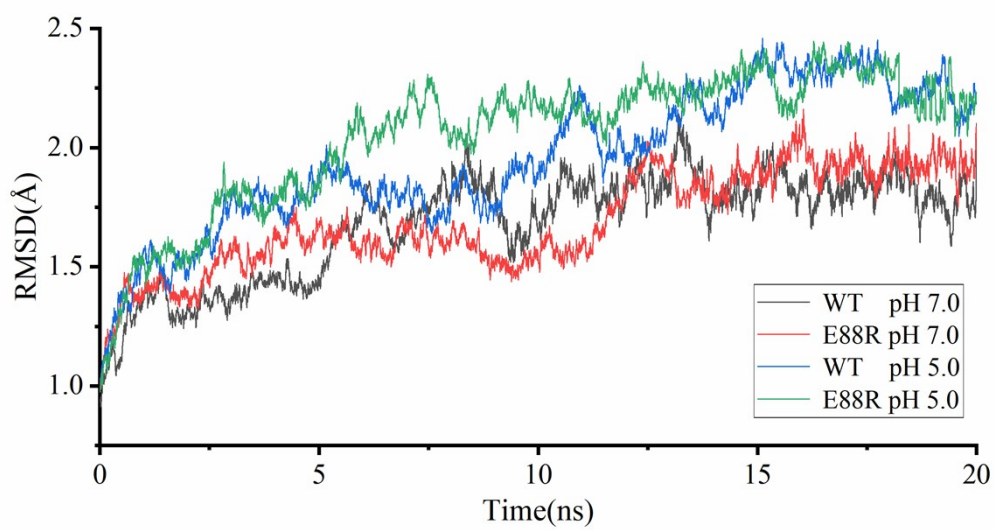

**Fig. S2.** The RMSD of the wild-type ASD (WT) and the E88R variant analyzed under acidic and neutral conditions.

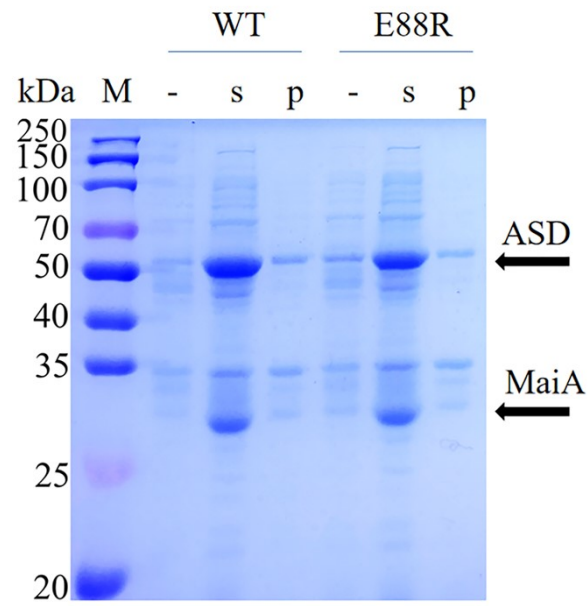

**Fig. S3.** Expression level of recombinant enzymes in the host strain were analyzed by SDS-PAGE. M: standard marker proteins, -: control, S: supernatants of cell lysates, P: precipitate of cell lysates. Recombinant maleate isomerase (MaiA) and ASD are indicated by arrows.
